# Supplementary material
Source: PubMed Central journal article supplement (PMC2806711)
Supplement: 0909705107_pnas.200909705SI.pdf [file 0909705107_pnas.200909705SI.pdf]

# Supporting Information

Lu et al. 10.1073/pnas.0909705107

## SI Experimental Procedures

### Primers for Kinase Constructs and BIK1, BAK1, and FLS2 Point Mutations.

The following primers were used in our study:

BIK1-F CGGGATCCATGGGTTCTT GCTTCAG,  
 BIK1-R GAAGGCCTCACAAAGGTGCCTGCCA,  
 BSK1-F CG GGATCCATGGGTTGTT GTCATCC,  
 BSK1-R TCCCCCGGGAGATCCTCTGCCGCTCG,  
 OXI1-F CG GGATCCATGCTAGAGG GAGATGAGAA,  
 OXI1-R GAAGGCCTAAATACCAAAAAATTGTTATCAC,  
 BIK1S233A-F ATGGGTGATTGGCTTATGTTAGTAC,  
 BIK1S233A-R GTACTAACATAAGCCAAATCACCCAT,  
 BIK1S236A-F TTGAGTTATGTTGCTACAAGGGTCAT,

BIK1S236A-R ATGACCCTTGTAGCAACATAACTCAA,  
 BIK1T237A-F AGTTATGTTAGTGCAAGGGTCATGG,  
 BIK1T237A-R CCATGACCCTTGCACTAACATAACT,  
 BIK1T242A-F GGGTCATGGGTGCTTATGGGTACG,  
 BIK1T242A-R CGTACCATAAGCACCCATGACCC,  
 BIK1KM-F GTCATCGCCGTTGACGCGCTTAACCAAGAA,  
 BIK1KM-R TTCTTGGTTAAGCGCTGCAACGGCGATGAC,  
 FLS2-KM-F GATTGCAGTAATGGTATGAATCTAAAG,  
 FLS2-KM-R CTTTAGATTCAATACCATTACTGCAATC,  
 BAK1KM-F CTTTAGTGGCCGTTATGAGGCTAAAAGAG,  
 BAK1KM-R CTCTTTAGCCTCATAACGGCCACTAAAG.

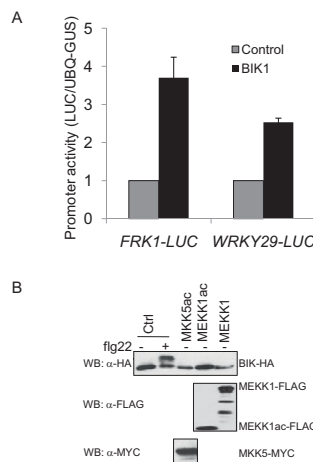

**Fig. S1.** BIK1 functions upstream of the MAPK cascade. (A) Expression of BIK1 activates *FRK1-LUC* and *WRKY29-LUC* in protoplasts. Protoplasts were co-transfected with *BIK1* and *FRK1-LUC* or *WRKY29-LUC* reporter and incubated for 6 h. *UBQ10-GUS* was included as a transfection control, and the promoter activity was presented as a LUC:GUS ratio. (B) BIK1 phosphorylation is upstream or independent of the MAPK cascade. Protoplasts were cotransfected with BIK1 and an active form of MKK5ac and MEK1ac or full-length MEK1 and incubated for 6 h. The phosphorylation of BIK1 protein was analyzed by Western blot with 12% SDS/PAGE. The expression of MEK1, MEK1ac, and MKK5ac is shown.

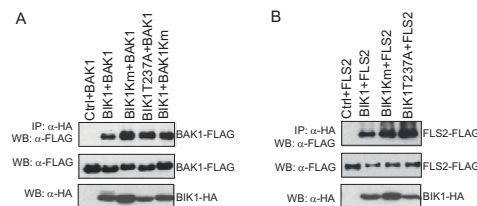

**Fig. S2.** The kinase activity of BIK1, BAK1, and FLS2 is not required for their association. (A) The association of BIK1, BAK1Km, and BIK1T237A with BAK1 and BAK1Km. (B) The association of BIK1, BAK1Km, and BIK1T237A with FLS2. The protoplasts were coexpressed with HA-tagged BIK1 or BIK1 mutants and FLAG-tagged FLS2 or BAK1. The control (Ctrl) was an empty vector control. Co-IP was carried out with an anti-HA antibody (IP: α-HA), and the proteins were analyzed using Western blot with an anti-FLAG antibody (WB: α-FLAG). (Top) BIK1 coimmunoprecipitates with BAK1 or FLS2. (Middle and bottom) The expression of BAK1 or FLS2 and BIK1 proteins.

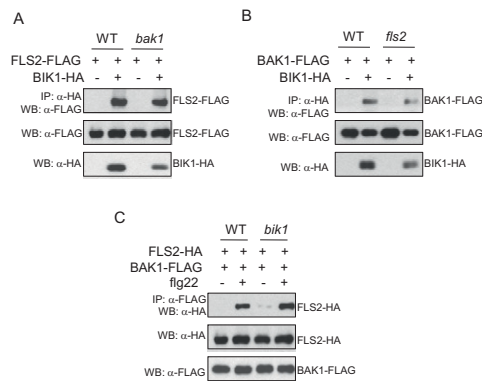

**Fig. 53.** The association among BIK1, FLS2, and BAK1 in *bak1*, *fls2*, and *bik1* mutants. (A) BIK1–FLS2 association is independent of BAK1. (B) BIK1–BAK1 association is independent of FLS2. (C) flg22-induced FLS2 and BAK1 association is BIK1-independent. The protoplasts were isolated from Col-0 [wild type (WT)], *bik1*, *bak1-4*, and *fls2* mutants and coexpressed with HA- or FLAG-tagged BIK1, FLS2, or BAK1. Co-IP was carried out with an anti-HA or anti-FLAG antibody (IP:  $\alpha$ -HA or  $\alpha$ -FLAG), and the proteins were analyzed using Western blot with an anti-FLAG or anti-HA antibody (WB:  $\alpha$ -FLAG or  $\alpha$ -HA). (Top) Coimmunoprecipitation results. (Middle and bottom) The expression of FLS2, BAK1, and BIK1 proteins. Protoplasts were stimulated with 1  $\mu$ M flg22 for 10 min in C.

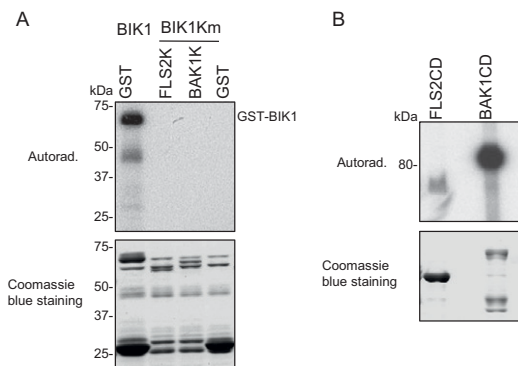

**Fig. 54.** Autophosphorylation activity of BIK1, BAK1CD, and FLS2CD. (A) GST-BIK1 exhibits strong autophosphorylation activity. An in vitro kinase assay was performed with incubating GST-BIK1 with GST and GST-BIK1Km with GST, GST-BAK1K, and GST-FLS2K in the presence of [ $^{32}$ P]- $\gamma$ -ATP. (B) Autophosphorylation activity of BAK1CD and FLS2CD. An in vitro kinase assay was performed with incubating MBP-BAK1CD or GST-FLS2CD in the presence of [ $^{32}$ P]- $\gamma$ -ATP. Proteins were separated with 7.5% SDS/PAGE and analyzed by autoradiography (Upper), and the protein loading control was shown by Coomassie Blue staining (Lower).

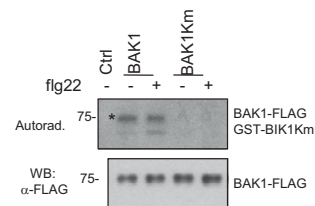

**Fig. 55.** BAK1 phosphorylates BIK1. An immunocomplex kinase assay was performed with protoplasts expressing FLAG-tagged BAK1 or BAK1Km. Immunoprecipitation was carried out with an anti-FLAG antibody, and the immunoprecipitated proteins were subjected to an in vitro kinase assay with GST-BIK1Km as a substrate in the presence of [ $^{32}$ P]- $\gamma$ -ATP. Proteins were separated with SDS/PAGE and analyzed by autoradiography (Upper), and the protein expression was detected by Western blot (Lower). The BAK1 autophosphorylation band (marked with an asterisk) is also shown.

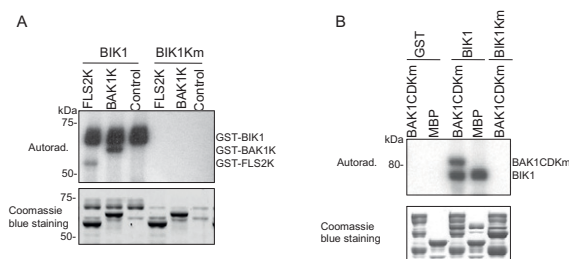

**Fig. 56.** BIK1 phosphorylates BAK1 and FLS2 in vitro. (A) BIK1 phosphorylates GST-BAK1K and GST-FLS2K. (B) BIK1 phosphorylates MBP-BAK1CDKm. An in vitro kinase assay was performed by incubating GST-FLS2K, GST-BAK1K, or MBP-BAK1CDKm with GST-BIK1 or its kinase mutant. Proteins were separated with SDS/PAGE and analyzed by autoradiography (Upper). The protein loading control was shown by Coomassie blue staining (Lower).

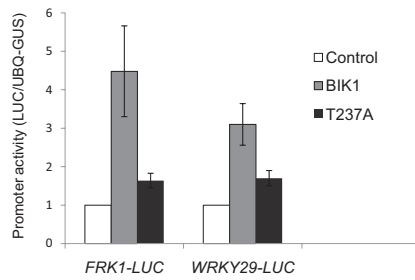

**Fig. S7.** T237 is required for BIK1 activation of *FRK1-LUC* and *WRKY29-LUC* in protoplasts. Protoplasts were cotransfected with *BIK1* or *BIK1T237A* and *FRK1-LUC* or *WRKY29-LUC* reporter and incubated for 6 h. *UBQ10-GUS* was included as a transfection control, and the promoter activity was presented as a LUC:GUS ratio.

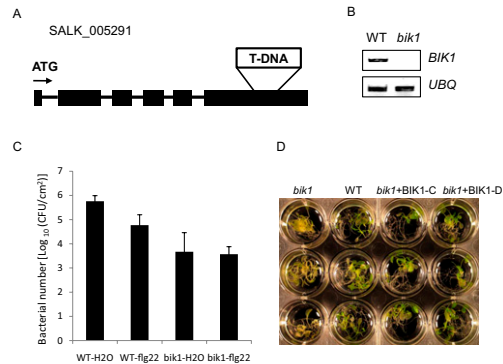

**Fig. S8.** BIK1 is involved in MAMP signaling. (A) T-DNA insertion site in *bik1* with exons (solid boxes). (B) RT-PCR analysis of *BIK1* and *UBQ10* (control) in wild-type (WT) and *bik1* mutant plants. (C) *bik1* mutant lost flg22-mediated immunity. Four-week-old plants were pretreated with 200 nM flg22 or H<sub>2</sub>O for 24 h before being inoculated with *Pst* DC3000 at the concentration of  $5 \times 10^5$  cfu/mL. Bacterial counting was performed 3 days after infection. (D) *bik1* mutants are compromised in plant immunity to *Pst* DC3000 *hrcC*. Twelve-day-old WT, *bik1*, and BIK1 complementation (*bik1*+BIK1-C and *bik1*+BIK1-D) seedlings were infected with *Pst* DC3000 *hrcC*. The photo was taken 6 days after infection.
